# Supplementary material for: Solvatochromism and pH effect on the emission of a triphenylimidazole-phenylacrylonitrile derivative: experimental and DFT studies
Source: Royal Society of Chemistry journal article supplement (doi:10.1039/c9ra01275c), 2019-01-01
Supplement: c9ra01275c1.pdf [file c9ra01275c1.pdf]

## Supporting Information

### Solvatochromism and pH effect on emission of triphenyl imidazole-phenylacrylonitrile derivative. Experimental and DFT studies

Karnambaram Anandhan<sup>a</sup>, Margarita Cerón<sup>a</sup>, Venkatesan Perumal<sup>a</sup>, Paulina Ceballos<sup>a</sup>, Paola Gordillo-Guerra<sup>a</sup>, Enrique Pérez-Gutiérrez<sup>a</sup>, Armando E. Castillo<sup>a</sup>, Subbiah Thamotharan<sup>b</sup> and M. Judith Percino<sup>a\*</sup>

#### Table of Contents

|                                                                                                                                                                              |     |
|------------------------------------------------------------------------------------------------------------------------------------------------------------------------------|-----|
| IR spectrum of the (Z)-3-(4-(4,5-diphenyl-1H-imidazol-2-yl)phenyl)-2-phenylacrylonitrile.....                                                                                | S2  |
| <sup>1</sup> H- and <sup>13</sup> C -NMR spectra of the (Z)-3-(4-(4,5-diphenyl-1H-imidazol-2-yl)phenyl)-2-phenylacrylonitrile (2).....                                       | S3  |
| MS-(ESI) spectra of the (Z)-3-(4-(4,5-diphenyl-1H-imidazol-2-yl)phenyl)-2-phenylacrylonitrile (2).....                                                                       | S4  |
| Figure S1. The relationship between stokes shift (nm) and the solvent polarity for the compound 2 in different solvent.....                                                  | S5  |
| Figure S2. Absorption spectrum of compound 2 in different solvents.....                                                                                                      | S6  |
| Figure S3. Absorption onset spectroscopically determined the energy gap for the compound 2 in different solvents.....                                                        | S7  |
| Figure S4. Absorption onset, spectroscopically determined the energy gap for the compound 2 in pH2, 7, 14.....                                                               | S8  |
| Fluorescence quantum yield calculation.....                                                                                                                                  | S9  |
| Figure S5 Cyclic Voltammograms of the compound 2 in DCM.....                                                                                                                 | S9  |
| Table S1 Crystal data and refinement parameters for compound 2.....                                                                                                          | S10 |
| Table S2. Selected dihedral angles (°) for compound 2.....                                                                                                                   | S11 |
| Table S3. Bond lengths (Å) for data of compound 2.....                                                                                                                       | S12 |
| Table S4. Bond angles (°) for compound 2.....                                                                                                                                | S13 |
| Table S5. Torsion angles (°) for compound 2.....                                                                                                                             | S14 |
| Table S6. The data of absorption, emission for the compound 2 in the solid state.....                                                                                        | S16 |
| Table S7. Optoelectronic properties for Compound 2 at B3LYP/MIDIX level of theory.....                                                                                       | S17 |
| Table S8. Experimental and computed absorption wavelength (λ, in nm) for compound 2.<br>The B3LYP/6-311+G(d,p) level of the was used for this calculation.....               | S17 |
| Table S9 Computed absorption wavelength (λ, in nm) for compound 2 in cation and anion environment.<br>The B3LYP/6-311+G(d,p) level of the was used for this calculation..... | S17 |
| Table S10 The selected second order perturbation energy (E <sup>2</sup> in kcal mol <sup>-1</sup> ) for title compound at neutral environment.....                           | S18 |
| Table S11. The selected second order perturbation energy (E <sup>2</sup> in kcal mol <sup>-1</sup> ) for compound 2 at cation environment.....                               | S19 |
| Table S12. The selected second order perturbation energy (E <sup>2</sup> in kcal mol <sup>-1</sup> ) for title compound at anion environment.....                            | S20 |

IR spectrum of the (Z)-3-(4-(4,5-diphenyl-1H-imidazol-2-yl)phenyl)-2-phenylacrylonitrile (2).

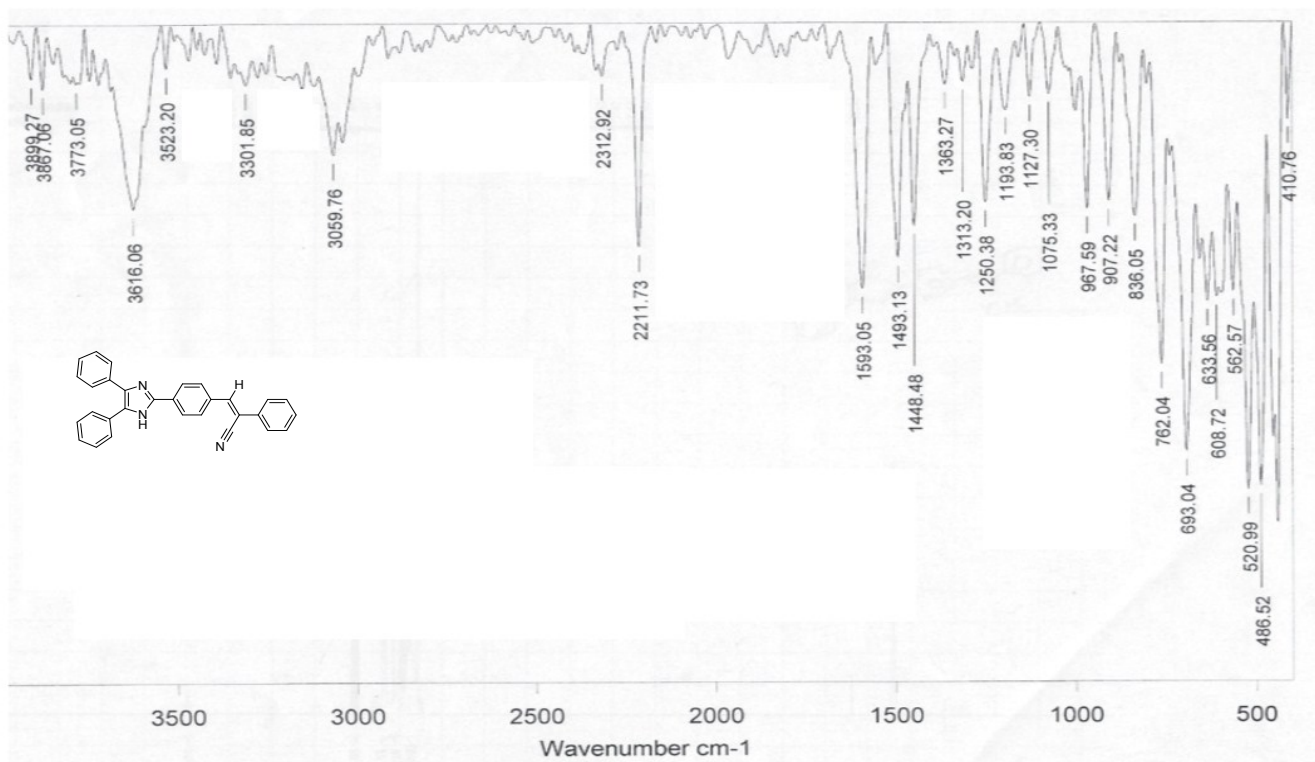

$^1\text{H}$ - and  $^{13}\text{C}$ -NMR spectra of the (Z)-3-(4-(4,5-diphenyl-1H-imidazol-2-yl)phenyl)-2-phenylacrylonitrile (**2**).

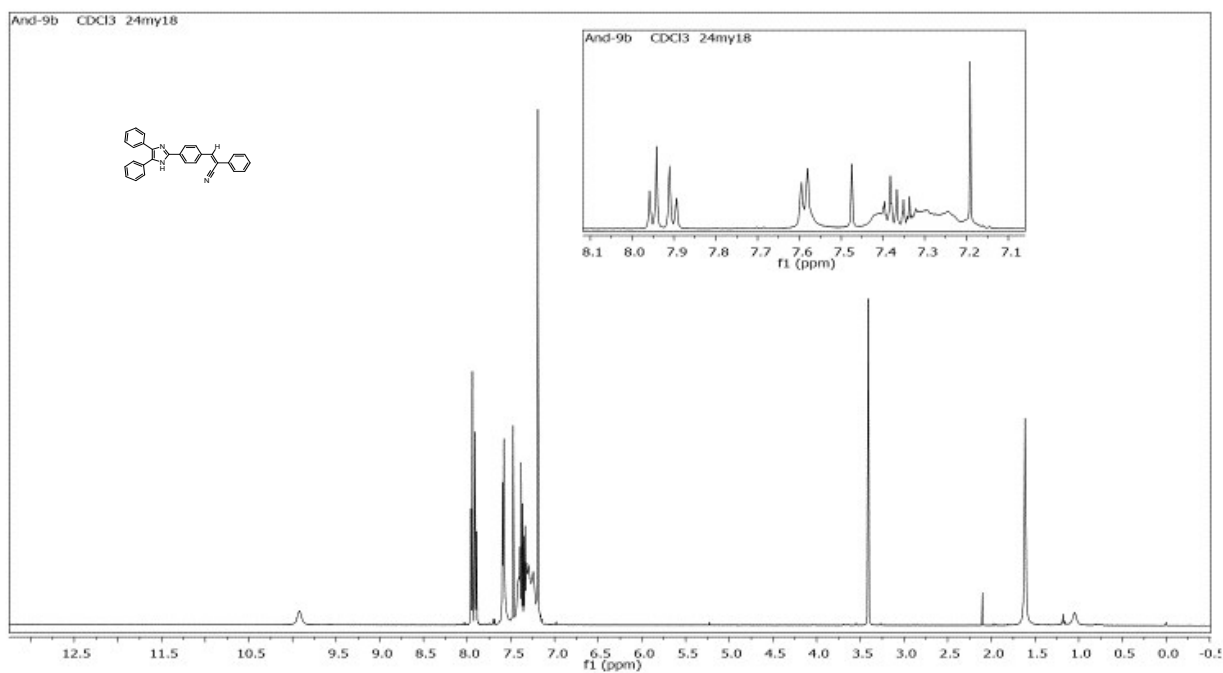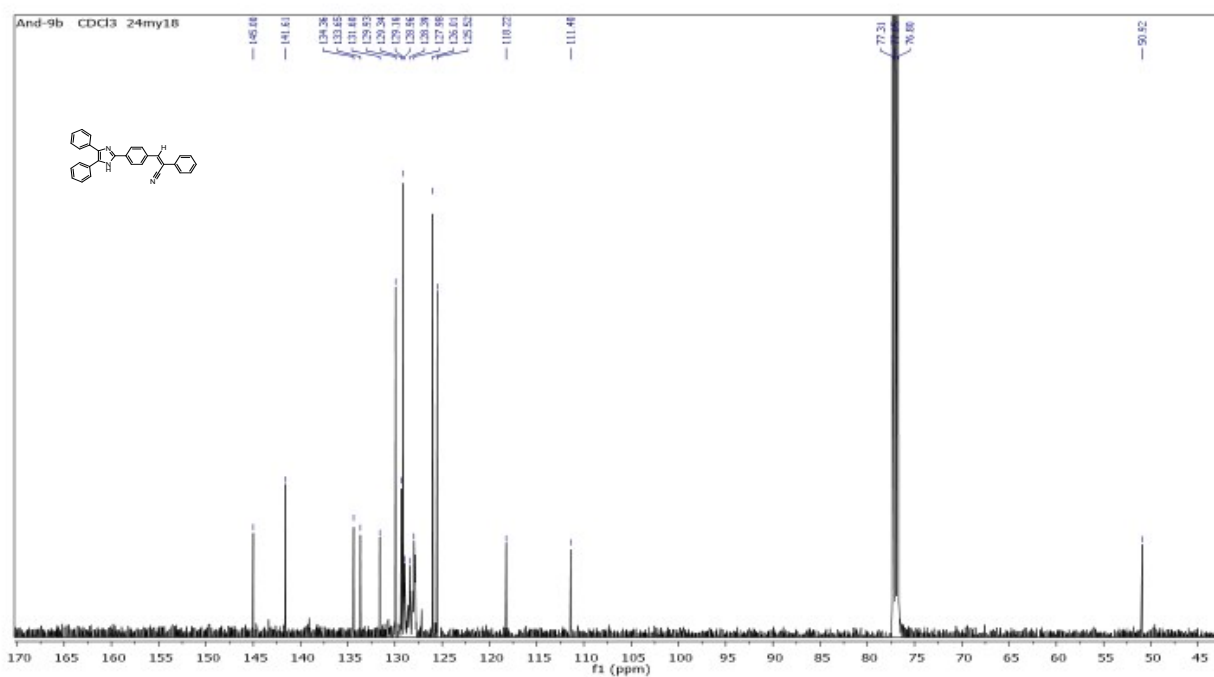

MS-(ESI) spectra of the (Z)-3-(4-(4,5-diphenyl-1H-imidazol-2-yl)phenyl)-2-phenylacrylonitrile (**2**).

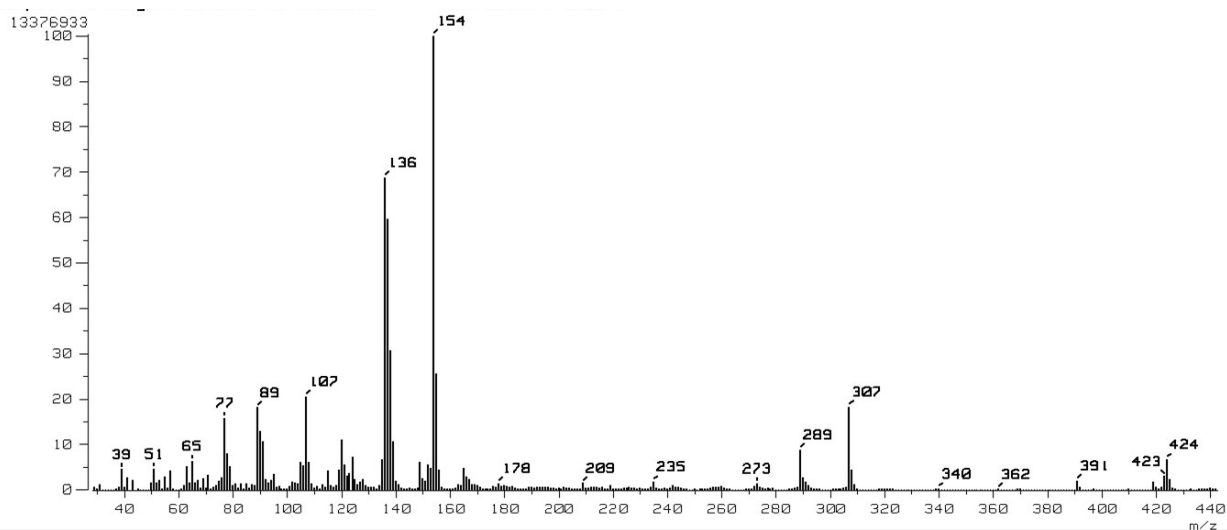

## The Lippert-Mataga plot

The expression for  $\Delta f(\epsilon, n)$ , given as,

$$\Delta f(\epsilon, n) = \frac{\epsilon - 1}{2\epsilon + 1} - \frac{n^2 - 1}{2n^2 + 1} \quad (1)$$

Where  $\epsilon$  and  $n$  are the dielectric constant and refractive index of the solvents, respectively.

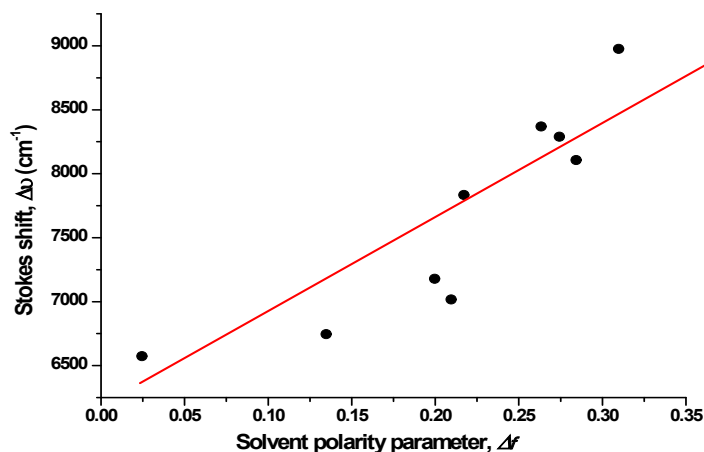

**Figure S1.** The relationship between stokes shift (nm) and the solvent polarity parameter for the compound **2** in different solvent.

## Optical band gap calculation

$$\alpha h\nu = (h\nu - E_{\text{gap}})^n \quad (2)$$

Where  $\alpha$  is the absorbance,  $E_{\text{gap}}$  is the band gap corresponding to absorption of photon energy at  $h\nu$  and  $n$  is  $1/2$  for allowed direct,  $3/2$  for forbidden direct,  $2$  for allowed indirect and  $3$  for forbidden indirect transitions in the materials. The direct band where obtained from extrapolation of the straight-line portion of their  $(\alpha h\nu)^2$  versus  $h\nu$  plots to  $\alpha = 0$

For  $E_{\text{gap}}$  values are calculated from spectra, it was used a straight line was fitted to the edge of spectra and its intersection with the corrected baseline was determined.

Figure -S2 absorption spectra of the compound 2 in the various solvents.

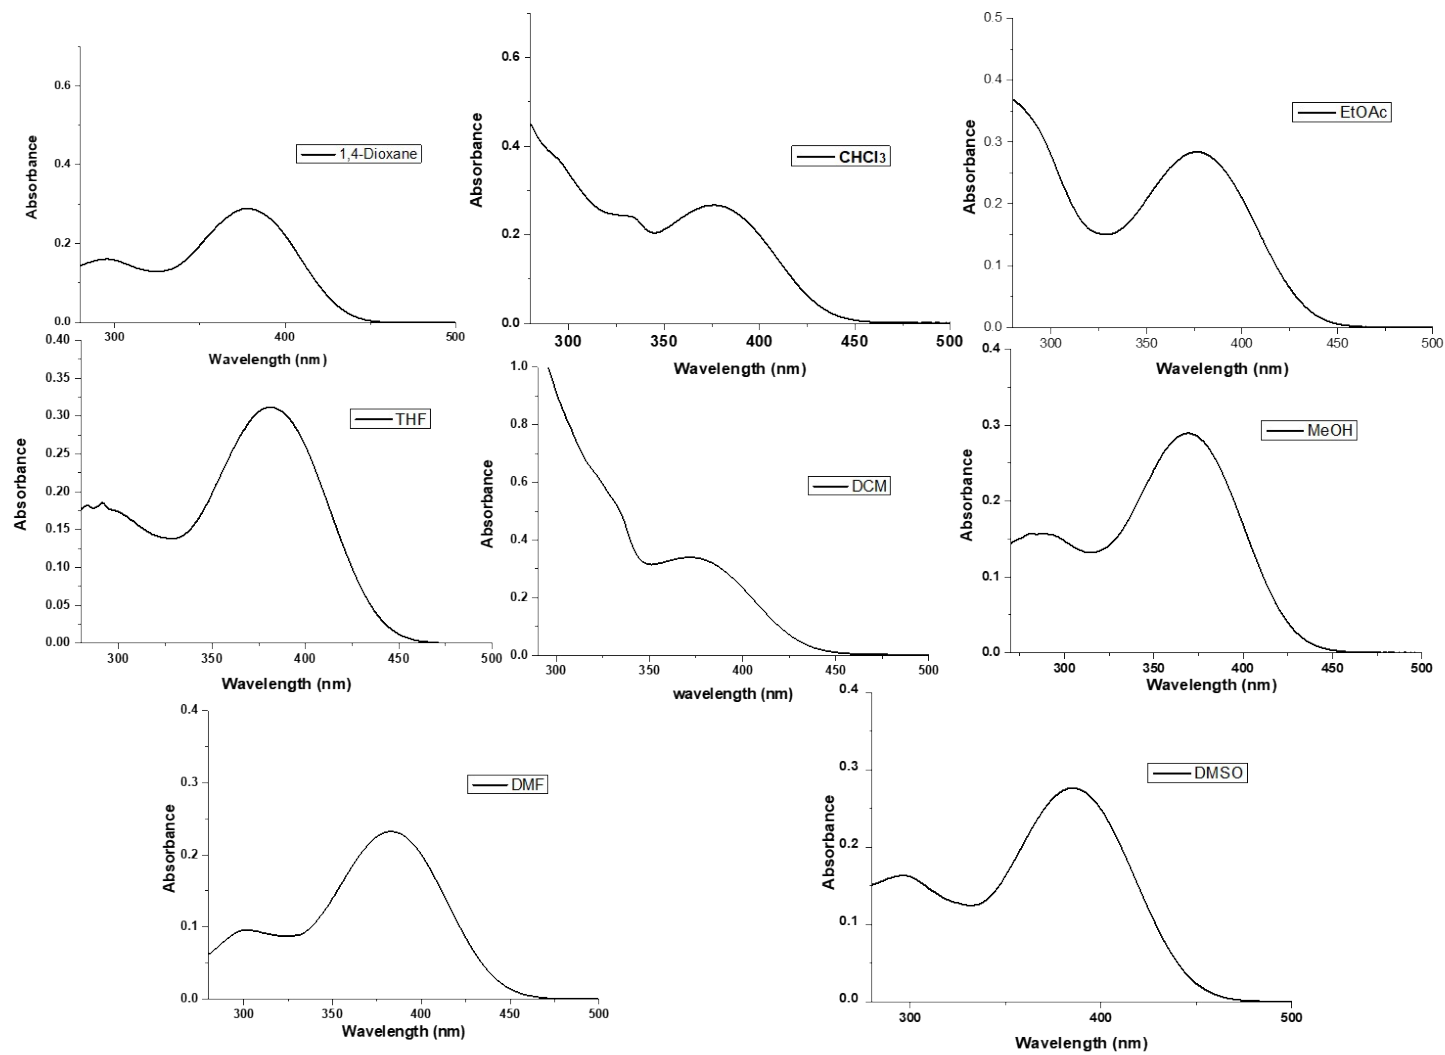

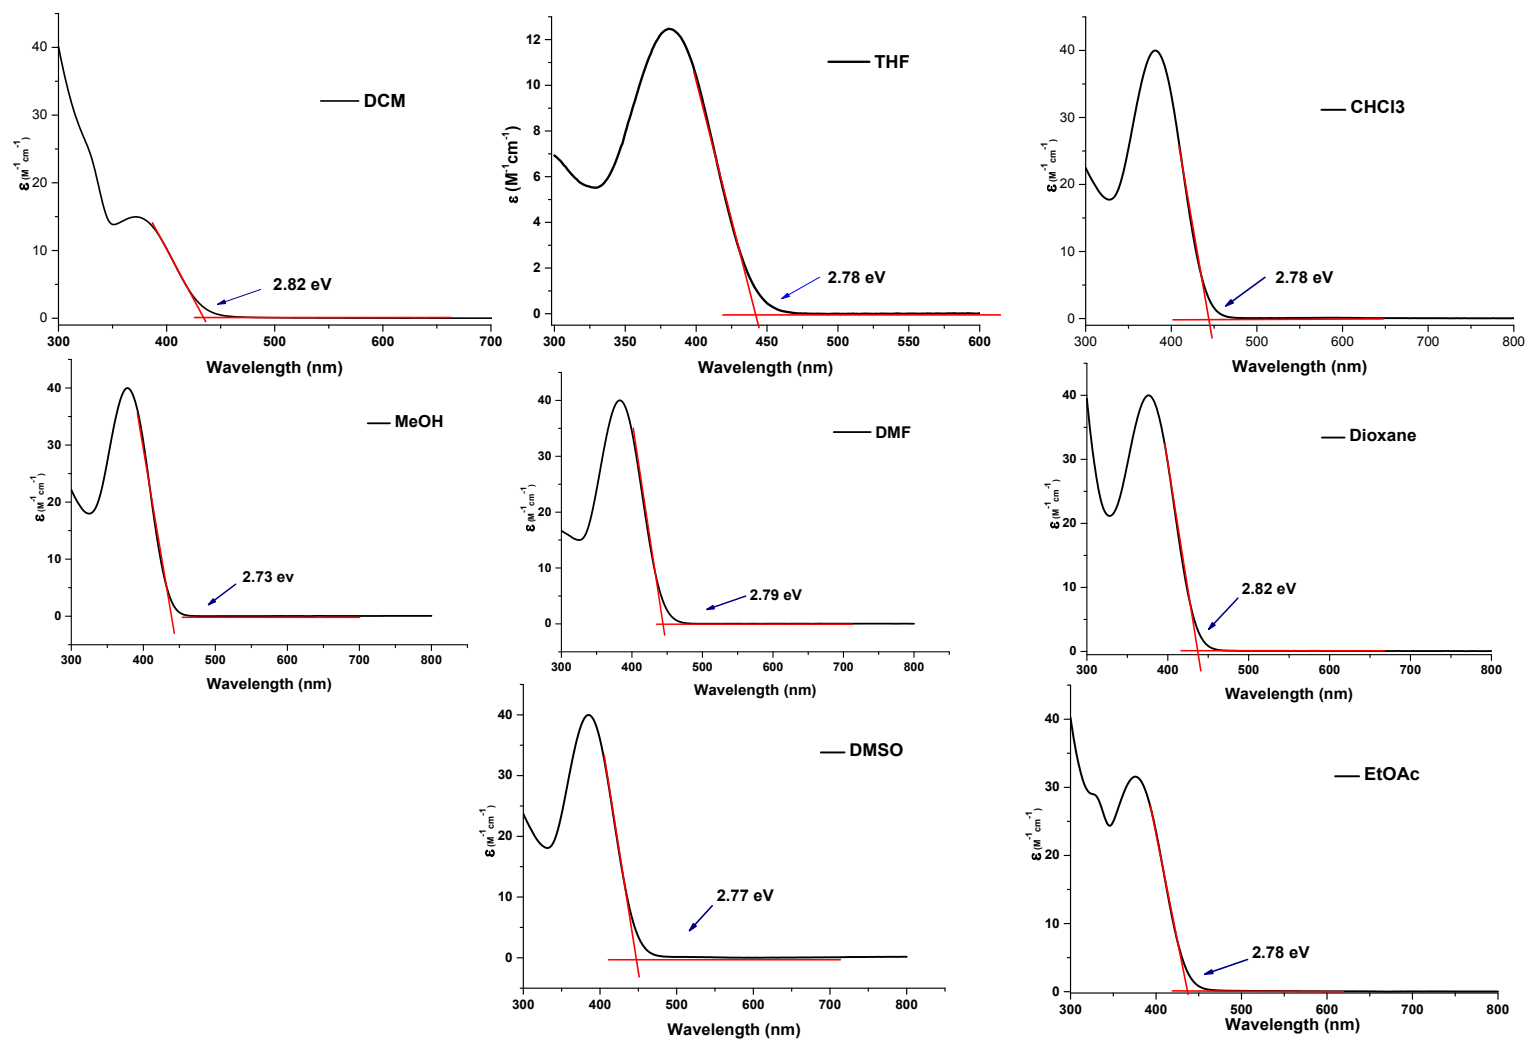

**Figure S3** Absorption onset, spectroscopically determined the energy gap for the compound **2** in different solvents.

**Figure S4.** Absorption onset, spectroscopically determined the energy gap for the compound **2** in pH 2, pH 7 and pH 14

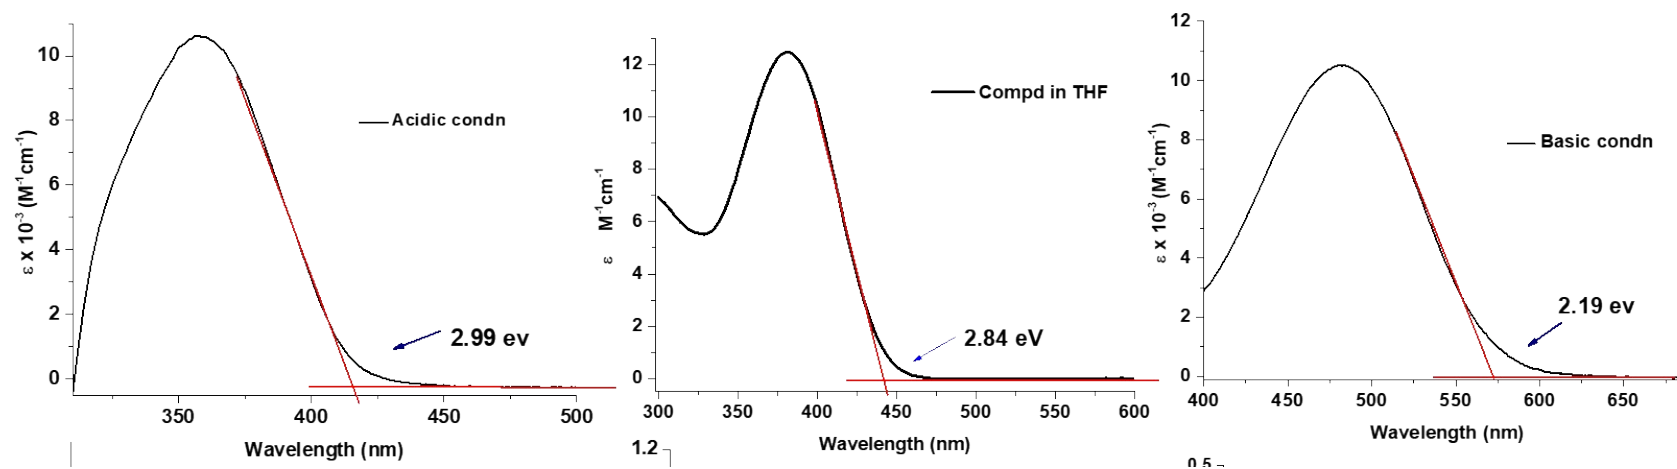



## Fluorescence quantum yield

The PL quantum yield ( $\Phi_F$ ) were evaluated according to the following equation (1) and using a fluorescein solution of 0.1 M NaOH as reference (r).

$$\Phi_x = \Phi_r \left( \frac{Grad_x}{Grad_r} \right) \left( \frac{\eta_x^2}{\eta_r^2} \right) \quad (3)$$

Where  $\Phi$  is the fluorescence quantum yield, *Grad* refers to the gradient from the plot of integrated fluorescence intensity (excited at 405 nm) against the absorbance,  $\eta$  is the refractive index of the solvent, and the subscripts r and x mean the standard and test sample respectively.<sup>1</sup>

## The Cyclo voltammogrammetric studies

Electrochemical properties of the compound **2** were evaluated by cyclic voltammetry (CV) in DCM with 0.1 M tetrabutylammonium hexafluorophosphate as supporting electrolyte at a scan rate of 50 mV<sup>-1</sup>s. The Pt acted as the working and saturated calomel electrode (SCE) as the reference electrode. This method is widely used for estimating the energy level of the organic compound. From the oxidation ( $I_p$ ) and reduction ( $E_a$ ) potential, the HOMO and LUMO energy levels were calculated using the equation (3) and (4) and the band gap  $E_{gap}$  deduced from equation (5).<sup>2,3</sup>

$$I_p = -(E_{ox} + 4.4) \text{ eV}, \quad (3)$$

$$E_a = -(E_{red} + 4.4) \text{ eV}, \quad (4)$$

$$E_g = I_p - E_a \quad (5)$$

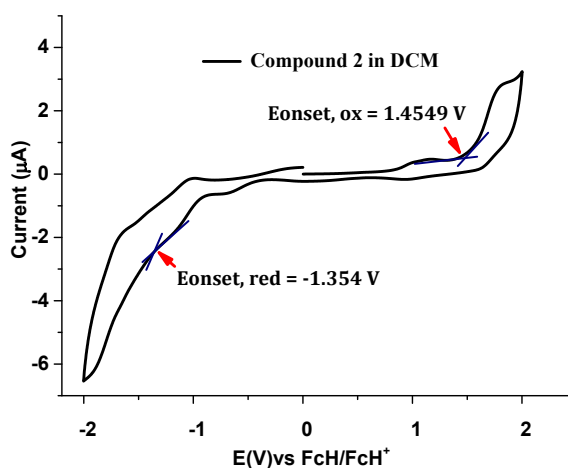

**Fig S5** Cyclic Voltagrams of the compound **2** in DCM (50mV/s scan rate)

**Table S1** Crystal data and refinement parameters for compound 2

| Parameters                                                                 | Values                                                                                                                                                                                                                                                                               |
|----------------------------------------------------------------------------|--------------------------------------------------------------------------------------------------------------------------------------------------------------------------------------------------------------------------------------------------------------------------------------|
| Chemical formula                                                           | C <sub>30</sub> H <sub>21</sub> N <sub>3</sub> ·2(H <sub>2</sub> O)                                                                                                                                                                                                                  |
| Mw                                                                         | 459.53                                                                                                                                                                                                                                                                               |
| Crystal system,<br>space group                                             | Monoclinic, P21/c                                                                                                                                                                                                                                                                    |
| Temperature (K)                                                            | 110                                                                                                                                                                                                                                                                                  |
| a, b, c (Å)                                                                | 19.3734 (9), 7.6646 (4), 16.9594<br>(6)                                                                                                                                                                                                                                              |
| β (°)                                                                      | 110.353 (4)                                                                                                                                                                                                                                                                          |
| V (Å <sup>3</sup> )                                                        | 2361.07 (19)                                                                                                                                                                                                                                                                         |
| Z                                                                          | 4                                                                                                                                                                                                                                                                                    |
| Radiation type                                                             | Cu Kα                                                                                                                                                                                                                                                                                |
| μ (mm <sup>-1</sup> )                                                      | 0.65                                                                                                                                                                                                                                                                                 |
| Crystal size (mm)                                                          | 0.18 × 0.06 × 0.02                                                                                                                                                                                                                                                                   |
| <b>Data collection</b>                                                     |                                                                                                                                                                                                                                                                                      |
| Diffractionmeter                                                           | SuperNova, Dual, Cu at zero,<br>Atlas                                                                                                                                                                                                                                                |
| Absorption<br>correction                                                   | Analytical numeric absorption<br>correction using a multifaceted<br>crystal model based on<br>expressions derived by R.C. Clark<br>& J.S. Reid. <sup>4</sup> Empirical absorption<br>correction using spherical<br>harmonics, implemented in<br>SCALE3 ABSPACK scaling<br>algorithm. |
| Tmin, Tmax                                                                 | 0.937, 0.990                                                                                                                                                                                                                                                                         |
| No. of measured,<br>independent and<br>observed [I > 2σ(I)]<br>reflections | 15779, 4639, 3338                                                                                                                                                                                                                                                                    |
| Rint                                                                       | 0.056                                                                                                                                                                                                                                                                                |
| (sin θ/λ) <sub>max</sub> (Å <sup>-1</sup> )                                | 0.616                                                                                                                                                                                                                                                                                |
| <b>Refinement</b>                                                          |                                                                                                                                                                                                                                                                                      |
| R[F <sub>2</sub> > 2σ(F <sub>2</sub> )],<br>wR(F <sub>2</sub> ), S         | 0.044, 0.111, 1.01                                                                                                                                                                                                                                                                   |
| No. of reflections                                                         | 4639                                                                                                                                                                                                                                                                                 |
| No. of parameters                                                          | 331                                                                                                                                                                                                                                                                                  |
| No. of restraints                                                          | 7                                                                                                                                                                                                                                                                                    |
| H-atom treatment                                                           | H atoms treated by a mixture of<br>independent and constrained<br>refinement                                                                                                                                                                                                         |
| Δρ <sub>max</sub> , Δρ <sub>min</sub> (e<br>Å <sup>-3</sup> )              | 0.25, -0.26                                                                                                                                                                                                                                                                          |

**Table S2.** Selected dihedral angles (°) for compound **2**

| <b>Bond</b>             | <b>Angle (°)</b> |
|-------------------------|------------------|
| C(1)C(6)-C(7)-N(1)      | 136.66(18)       |
| C(5)-C(6)-C(7)-N(1)     | -41.3(3)         |
| C(1)-C(6)-C(7)-C(8)     | -40.2(3)         |
| C(5)-C(6)-C(7)-C(8)     | 141.9(2)         |
| N(1)-C(7)-C(8)-N(2)     | -1.1(2)          |
| N(2)-C(15)-N(1)-C(7)    | -0.8(2)          |
| C(8)-C(7)-N(1)-C(15)    | 1.2(2)           |
| N(1)-C(15)-N(2)-C(8)    | 0.1(2)           |
| C(7)-C(8)-N(2)-C(15)    | 0.7(2)           |
| C(6)-C(7)-C(8)-C(9)     | -5.3(4)          |
| N(2)-C(8)-C(9)-C(10)    | -22.0(3)         |
| C(7)-C(8)-C(9)-C(14)    | -20.2(3)         |
| C(8)-C(9)-C(14)-C(13)   | 176.91(18)       |
| N(2)-C(15)-C(16)-C(21)  | 21.8(3)          |
| N(1)-C(15)-C(16)-C(17)  | 22.3(3)          |
| C(18)-C(19)-C(22)-C(23) | -25.6(3)         |
| C(19)-C(22)-C(23)-C(24) | -9.3(3)          |
| C(22)-C(23)-C(25)-C(30) | -21.3(3)         |
| C(24)-C(23)-C(25)-C(26) | -17.1(2)         |

**Table S3.** Bond lengths (Å) for data of compound **2**

|              |           |
|--------------|-----------|
| C(1)-C(2)    | 1.382(3)  |
| C(1)-C(6)    | 1.397(3)  |
| C(2)-C(3)    | 1.392(3)  |
| C(3)-C(4)    | 1.387(3)  |
| C(4)-C(5)    | 1.388(3)  |
| C(5)-C(6)    | 1.400(2)  |
| C(6)-C(7)    | 1.469(3)  |
| C(7)-N(1)    | 1.383(2)  |
| C(7)-C(8)    | 1.391(2)  |
| C(8)-N(2)    | 1.380(2)  |
| C(8)-C(9)    | 1.475(2)  |
| C(9)-C(10)   | 1.398(3)  |
| C(9)-C(14)   | 1.400(3)  |
| C(10)-C(11)  | 1.392(2)  |
| C(11)-C(12)  | 1.384(3)  |
| C(12)-C(13)  | 1.392(3)  |
| C(13)-C(14)  | 1.391(2)  |
| C(15)-N(2)   | 1.329(2)  |
| C(15)-N(1)   | 1.349(2)  |
| C(15)-C(16)  | 1.468(2)  |
| C(16)-C(21)  | 1.389(3)  |
| C(16)-C(17)  | 1.405(2)  |
| C(17)-C(18)  | 1.379(3)  |
| C(18)-C(19)  | 1.396(3)  |
| C(19)-C(20)  | 1.410(2)  |
| C(19)-C(22)  | 1.456(3)  |
| C(20)-C(21)  | 1.385(3)  |
| C(22)-C(23)  | 1.358(2)  |
| C(23)-C(24)  | 1.439(3)  |
| C(23)-C(25)  | 1.482(3)  |
| C(24)-N(3)   | 1.149(3)  |
| C(25)-C(30)  | 1.398(3)  |
| C(25)-C(26)  | 1.402(2)  |
| C(26)-C(27)  | 1.380(3)  |
| C(27)-C(28)  | 1.384(3)  |
| C(28)-C(29)  | 1.397(3)  |
| C(29)-C(30)  | 1.386(3)  |
| N(1)-C(1N)   | 0.880(18) |
| O(1W)-H1(W1) | 0.84(2)   |
| O(1W)-H1(W2) | 0.86(2)   |
| O(2W)-H(2W1) | 0.86(2)   |
| C(2W)-H(2W2) | 0.84(2)   |

**Table S4. Bond angles (°) for compound 2**

|                   |            |                     |            |
|-------------------|------------|---------------------|------------|
| C(2)-C(1)-C(6)    | 120.60(16) | C(21)-C(16)-C(15)   | 121.03(14) |
| C(2)-C(1)-H(1)    | 119.7      | C(17)-C(16)-C(15)   | 119.80(17) |
| C(6)-C(1)-H(1)    | 119.7      | C(18)-C(17)-C(16)   | 120.18(17) |
| C(1)-C(2)-C(3)    | 120.55(18) | C(18)-C(17)-H(17)   | 119.9      |
| C(1)-C(2)-H(2)    | 119.7      | C(16)-C(17)-H(17)   | 119.9      |
| C(3)-C(2)-H(2)    | 119.7      | C(17)-C(18)-C(19)   | 121.21(15) |
| C(4)-C(3)-C(2)    | 119.32(19) | C(17)-C(18)-H(18)   | 119.4      |
| C(4)-C(3)-H(3)    | 120.3      | C(19)-C(18)-H(18)   | 119.4      |
| C(2)-C(3)-H(3)    | 120.3      | C(18)-C(19)-C(20)   | 118.27(17) |
| C(3)-C(4)-C(5)    | 120.41(17) | C(18)-C(19)-C(22)   | 122.91(15) |
| C(3)-C(4)-H(4)    | 119.8      | C(20)-C(19)-C(22)   | 118.78(17) |
| C(5)-C(4)-H(4)    | 119.8      | C(21)-C(20)-H(19)   | 120.50(18) |
| C(4)-C(5)-C(6)    | 120.52(17) | C(21)-C(20)-H(20)   | 119.7      |
| C(4)-C(5)-H(5)    | 119.7      | C(19)-C(20)-H(20)   | 119.7      |
| C(6)-C(5)-H(5)    | 119.7      | C(20)-C(21)-C(16)   | 120.65(15) |
| C(1)-C(6)-C(5)    | 118.59(17) | C(20)-C(21)-H(21)   | 119.7      |
| C(1)-C(6)-C(7)    | 121.24(15) | C(16)-C(21)-H(21)   | 119.7      |
| C(5)-C(6)-C(7)    | 120.13(16) | C(23)-C(22)-C(19)   | 127.72(18) |
| N(1)-C(7)-C(8)    | 104.66(16) | C(23)-C(22)-H(22)   | 116.1      |
| N(1)-C(7A)-C(6)   | 120.46(14) | C(19)-C(22)-H(22)   | 116.1      |
| C(8)-C(7)-C(6)    | 134.83(15) | C(22)-C(23)-C(24)   | 120.07(17) |
| N(2)-C(8)-C(7)    | 109.72(14) | C(22)-C(23)-C(25)   | 124.11(18) |
| N(2)-C(8)-C(8)    | 119.67(16) | C(24)-C(23)-C(25)   | 115.75(14) |
| C(7)-C(8)-C(9)    | 130.59(18) | N(3)-C(24)-C(23)    | 177.5(2)   |
| C(10)-C(9)-C(14)  | 118.25(15) | C(30)-C(25)-C(26)   | 118.54(17) |
| C(10)-C(9)-C(8)   | 119.48(17) | C(30)-C(25)-C(23)   | 120.98(15) |
| C(14)-C(9)-C(9)   | 122.27(16) | C(26)-C(25)-C(23)   | 120.47(17) |
| C(11)-C(10)-C(9)  | 120.89(18) | C(27)-C(26)-C(25)   | 120.75(18) |
| C(11)-C(10)-H(10) | 119.6      | C(27)-C(26)-H(26)   | 119.6      |
| C(9)-C(10)-H(10)  | 119.6      | C(25)-C(26)-H(26)   | 119.6      |
| C(12)-C(11)-C(10) | 120.26(17) | C(26)-C(27)-C(28)   | 120.51(16) |
| C(12)-C(11)-H(11) | 119.9      | C(26)-C(27)-H(27)   | 119.7      |
| C(10)-C(11)-H(11) | 119.9      | C(28)-C(27)-H(27)   | 119.7      |
| C(11)-C(12)-C(13) | 119.56(15) | C(27)-C(28)-C(29)   | 119.39(18) |
| C(11)-C(12)-H(12) | 120.2      | C(27)-C(28)-H(28)   | 120.3      |
| C(13)-C(12)-H(12) | 120.2      | C(29)-C(28)-H(28)   | 120.3      |
| C(14)-C(13)-C(12) | 120.25(18) | C(30)-C(29)-C(28)   | 120.35(19) |
| C(14)-C(13)-H(13) | 119.9      | C(30)-C(29)-H(29)   | 119.8      |
| C(12)-C(13)-H(13) | 119.9      | C(28)-C(29)-H(29)   | 119.8      |
| C(13)-C(14)-C(9)  | 120.68(17) | C(29)-C(30)-C(25)   | 120.43(16) |
| C(13)-C(14)-H(14) | 119.7      | C(29)-C(30)-H(30)   | 119.8      |
| C(9)-C(14)-H(14)  | 119.7      | C(25)-C(30)-H(30)   | 119.8      |
| N(2)-C(15)-N(1)   | 111.01(16) | C(15)-N(1)-C(7)     | 108.52(13) |
| N(2)-C(15)-C(16)  | 124.79(17) | C(15)-N(1)-N(1N)    | 125.4(15)  |
| N(1)-C(15)-C(16)  | 124.19(14) | C(7)-N(1)-N(1N)     | 126.1(15)  |
| C(21)-C(16)-C(17) | 119.15(16) | C(15)-N(2)-C(8)     | 106.07(15) |
|                   |            | H(1W1)-O(1W)-H(1W2) | 108(2)     |
|                   |            | H(2W1)-O(2W)-H(2W2) | 112(2)     |

**Table S5** Torsion angles (°) for compound **2**

|                         |             |                         |             |
|-------------------------|-------------|-------------------------|-------------|
| C(6)-C(1)-C(2)-C(3)     | 0.0(3)      | C(21)-C(16)-C(17)-C(18) | 0.5(3)      |
| C(1)-C(2)-C(3)-C(4)     | 0.7(3)      | C(15)-C(16)-C(17)-C(18) | 178.76(17)  |
| C(2)-C(3)-C(4)-C(5)     | -0.6(3)     | C(16)-C(16)-C(18)-C(19) | 0.3(3)      |
| C(3)-C(4)-C(5)-C(6)     | -0.2(3)     | C(17)-C(18)-C(19)-C(20) | -1.7(3)     |
| C(2)-C(1)-C(6)-C(5)     | -0.8(3)     | C(17)-C(18)-C(19)-C(22) | -179.49(18) |
| C(2)-C(1)-C(6)-C(7)     | -178.73(17) | C(18)-C(19)-C(20)-C(21) | 2.3(3)      |
| C(4)-C(5)-C(6)-C(1)     | 0.9(3)      | C(22)-C(19)-C(20)-C(21) | -179.83(18) |
| C(4)-C(5)-C(6)-C(7)     | 178.87(17)  | C(19)-C(20)-C(21)-C(16) | -1.5(3)     |
| C(1)C(6)-C(7)-N(1)      | 136.66(18)  | C(17)-C(16)-C(21)-C(20) | 0.1(3)      |
| C(5)-C(6)-C(7)-N(1)     | -41.3(3)    | C(15)-C(16)-C(21)-C(20) | -178.13(17) |
| C(1)-C(6)-C(7)-C(8)     | -40.2(3)    | C(18)-C(19)-C(22)-C(23) | -25.6(3)    |
| C(5)-C(7)-C(7)-C(8)     | 141.9(2)    | C(20)-C(19)-C(22)-C(23) | 156.7(2)    |
| N(1)-C(7)-C(8)-N(2)     | -1.1(2)     | C(19)-C(22)-C(23)-C(24) | -9.3(3)     |
| C(6)-C(7)-C(8)-N(2)     | 176.1(2)    | C(19)-C(22)-C(23)-C(25) | 173.71(17)  |
| N(1)-C(7)-C(8)-C(9)     | 177.52(18)  | C(22)-C(23)-C(25)-C(30) | -21.3(3)    |
| C(6)-C(7)-C(8)-C(9)     | -5.3(4)     | C(24)-C(23)-C(25)-C(30) | 161.58(17)  |
| N(2)-C(8)-C(9)-C(10)    | -22.0(3)    | C(22)-C(23)-C(25)-C(26) | 160.00(18)  |
| C(7)-C(8)-C(9)-C(10)    | 159.4(2)    | C(24)-C(23)-C(25)-C(26) | -17.1(2)    |
| N(2)-C(8)-C(9)-C(14)    | 158.29(18)  | C(30)-C(25)-C(26)-C(27) | 1.8(3)      |
| C(7)-C(8)-C(9)-C(14)    | -20.2(3)    | C(23)-C(25)-C(26)-C(27) | -179.43(17) |
| C(14)-C(9)-C(10)-C(11)  | 3.1(3)      | C(25)-C(26)-C(27)-C(28) | -0.7(3)     |
| C(8)-C(9)-C(10)-C(11)   | -176.63(18) | C(26)-C(27)-C(28)-C(29) | -0.6(3)     |
| C(9)-C(10)-C(11)-C(12)  | -0.6(3)     | C(27)-C(28)-C(29)-C(30) | 0.7(3)      |
| C(10)-C(11)-C(12)-C(13) | -2.2(3)     | C(28)-C(29)-C(29)-C(25) | 0.5(3)      |
| C(11)-C(12)-C(13)-C(14) | 2.4(3)      | C(26)-C(25)-C(30)-C(29) | -1.7(3)     |
| C(12)-C(13)-C(14)-C(9)  | 0.1(3)      | C(23)-C(25)-C(30)-C(29) | 179.53(17)  |
| C(10)-C(9)-C(14)-C(13)  | -2.8(3)     | N(15)-C(15)-N(1)-C(7)   | -0.8(2)     |
| C(8)-C(9)-C(14)-C(13)   | 176.91(18)  | C(16)-C(15)-N(1)-C(7)   | -179.70(17) |
| N(2)-C(15)-C(16)-C(21)  | 21.8(3)     | C(8)-C(7)-N(1)-C(15)    | 1.2(2)      |
| N(1)-C(15)-C(16)-C(21)  | -159.52(18) | C(6)-C(7)-N(1)-C(15)    | -176.54(17) |
| N(2)-C(15)-C(16)-C(17)  | -156.48(18) | N(1)-C(15)-N(2)-C(8)    | 0.1(2)      |
| N(1)-C(15)-C(16)-C(17)  | 22.3(3)     | C(16)-C(15)-N(2)-C(8)   | 178.97(17)  |
|                         |             | C(7)-C(8)-N(2)-C(15)    | 0.7(2)      |
|                         |             | C(9)-C(8)-N(2)-C(15)    | -178.15(16) |

**Table S6.** The data of absorption, emission for the compound **2** in the solid state.

| Nature    | $\lambda_{\text{abs}}$<br>(nm) | $\lambda_{\text{em}}$<br>(nm) | $\Phi_F$ |
|-----------|--------------------------------|-------------------------------|----------|
| Powder    | 420 br                         | 563                           | 0.16     |
| Thin film | 388                            | 540                           | ND       |

$\lambda_{\text{abs}}$  = Maximum absorption wavelength;  $\lambda_{\text{em}}$  = Maximum absorption wavelength<sup>1</sup>;  $\Phi_F$  =

Quantum yield; ND = Not determined.



**Table S7.** Optoelectronic properties for Compound **2** at B3LYP/MIDIX level of theory.

| <b>Parameters</b>                                | <b>Values</b> |
|--------------------------------------------------|---------------|
| Oxidation Potential (eV)                         | 1.2822        |
| Reduction Potential (eV)                         | -             |
|                                                  | 1.4001        |
| Hole Reorganization Energy (HER) (eV)            | 0.2174        |
| Electron Reorganization Energy (ERE)(eV)         | 0.3238        |
| Triplet Energy (eV)                              | 1.8327        |
| Lmax (nm)                                        | 412           |
| E <sub>max</sub> (nm)                            | 458           |
| Stokes Shift                                     | 46            |
| Triplet Stabilization Energy (eV)                | 0.5449        |
| Hole Extraction Potential (eV)                   | 6.3368        |
| Electron Extraction Potential (eV)               | -             |
|                                                  | 1.2032        |
| Scaled HOMO (eV)                                 | -             |
|                                                  | 5.8121        |
| Scaled LUMO (eV)                                 | -             |
|                                                  | 3.1299        |
| Electron Small Polaron Stabilization Energy (eV) | 0.1859        |
| Hole Small Polaron Stabilization Energy (eV)     | 0.1191        |
| Triplet Reorganization Energy (eV)               | 2.008         |
| T1 Vertical Emission (eV)                        | 0.3019        |
| T1 Vertical Absorption (eV)                      | 2.3100        |
| T1 Raw Triplet Energy (eV)                       | 1.7651        |
| S1-T1 Gap (eV)                                   | 1.8530        |
| S1-T2 Gap (eV)                                   | 0.2558        |
| S1-T3 Gap (eV)                                   | -             |
|                                                  | 0.7439        |
| Dipole (D)                                       | 1.0851        |

All torsion angles follow the convention defined by Allen & Rogers (Allen, F.H. & Rogers, D. (1969) *Acta Cryst.* **B25**, 1326-1330)

**Table S8.** Experimental and computed absorption wavelength ( $\lambda$ , in nm) for compound **2**. (The B3LYP/6-311+G(d,p) level) of the was used for this calculation.

| $\lambda_{\text{abs}}$<br>(DFT) | eV   | $f$   | Major Transition<br>(%) | $\lambda_{\text{exp}}$ | $\lambda_{\text{abs}}$<br>(DFT) | eV   | $f$   | Major Transition<br>(%) | $\lambda_{\text{exp}}$ |
|---------------------------------|------|-------|-------------------------|------------------------|---------------------------------|------|-------|-------------------------|------------------------|
| <b>Gas</b>                      |      |       |                         |                        | <b>Cloroform</b>                |      |       |                         |                        |
| 444                             | 2.79 | 0.999 | H→ L (99)               |                        | 458                             | 2.71 | 1.180 | H→ L (99)               |                        |
| 341                             | 3.63 | 0.573 | H-1→ L (87)             |                        | 345                             | 3.60 | 0.418 | H-1→ L (95)             | 375                    |
| 329                             | 3.81 | 0.246 | H→ L+1 (86)             |                        | 325                             | 3.81 | 0.263 | H→ L+1 (94)             | 297                    |
| <b>1,4-Dioxane</b>              |      |       |                         |                        | <b>Ethyl acetate</b>            |      |       |                         |                        |
| 457                             | 2.71 | 1.175 | H→ L (99)               |                        | 456                             | 2.72 | 1.162 | H→ L (99)               |                        |
| 345                             | 3.59 | 0.435 | H-1→ L (95)             | 378                    | 344                             | 3.60 | 0.421 | H-1→ L (95)             | 376                    |
| 327                             | 3.79 | 0.256 | H→ L+1 (93)             | 300                    | 324                             | 3.82 | 0.255 | H→ L+1 (94)             | 293                    |
| <b>Major Transition</b>         |      |       |                         |                        | <b>Major Transition</b>         |      |       |                         |                        |
| 457                             | 2.72 | 1.170 | H→ L (99)               |                        | 457                             | 2.71 | 1.174 | H→ L (99)               |                        |
| 344                             | 3.60 | 0.416 | H-1→ L (95)             | 381                    | 344                             | 3.60 | 0.413 | H-1→ L (96)             | 371                    |
| 324                             | 3.82 | 0.260 | H→ L+1 (94)             | 305                    | 324                             | 3.82 | 0.263 | H→ L+1 (94)             | 281                    |
| <b>Metanol</b>                  |      |       |                         |                        | <b>DMF</b>                      |      |       |                         |                        |
| 455                             | 2.73 | 1.149 | H→ L (99)               |                        | 457                             | 2.71 | 1.176 | H→ L (99)               |                        |
| 343                             | 3.61 | 0.415 | H-1→ L (95)             | 370                    | 344                             | 3.60 | 0.407 | H-1→ L (96)             | 382                    |
| 323                             | 3.84 | 0.252 | H→ L+1 (94)             | 290                    | 324                             | 3.83 | 0.265 | H→ L+1 (94)             | 300                    |
| <b>DMSO</b>                     |      |       |                         |                        |                                 |      |       |                         |                        |
| 457                             | 2.72 | 1.173 | H→ L (99)               |                        |                                 |      |       |                         |                        |
| 344                             | 3.60 | 0.407 | H-1→ L (96)             | 385                    |                                 |      |       |                         |                        |
| 324                             | 3.83 | 0.264 | H→ L+1 (94)             | 297                    |                                 |      |       |                         |                        |

**Table S9** Computed absorption wavelength ( $\lambda$ , in nm) for compound 2 in cation and anion environment. The B3LYP/6-311+G(d,p) level of the was used for this calculation.

| Cation                          |      |       |                         | Anion                           |      |       |                         |
|---------------------------------|------|-------|-------------------------|---------------------------------|------|-------|-------------------------|
| $\lambda_{\text{abs}}$<br>(DFT) | eV   | $f$   | Major Transition<br>(%) | $\lambda_{\text{abs}}$<br>(DFT) | eV   | $f$   | Major Transition<br>(%) |
| <b>Gas</b>                      |      |       |                         |                                 |      |       |                         |
| 441                             | 2.81 | 1.229 | H→L (99)                | 582                             | 2.13 | 1.293 | H→L (96)                |
| 365                             | 3.39 | 0.083 | H-2→L (98)              | 389                             | 3.19 | 0.027 | H→L+3 (63)              |
| 317                             | 3.91 | 0.058 | H→L+1 (98)              |                                 |      |       | H→L+2 (17)              |
|                                 |      |       |                         | 372                             | 3.33 | 0.114 | H→L+2 (71)              |
|                                 |      |       |                         |                                 |      |       | H→L+3 (12)              |
| <b>THF</b>                      |      |       |                         |                                 |      |       |                         |
| 418                             | 2.97 | 1.456 | H→L (99)                | 563                             | 2.20 | 1.303 | H→L (100)               |
| 356                             | 3.48 | 0.033 | H-1→L (98)              | 370                             | 3.35 | 0.209 | H→L+1 (96)              |
| 300                             | 4.13 | 0.050 | H-4→L (85)              | 350                             | 3.54 | 0.361 | H-2→L (69)              |
|                                 |      |       |                         |                                 |      |       | H-3→L (15)              |

**Table S10** The selected second order perturbation energy ( $E^2$  in kcal mol<sup>-1</sup>) for compound **2** at neutral environment.

| Donor NBO (i)                                | Acceptor NBO (j)   | $E^2$ | Donor NBO (i)                                | Acceptor NBO (j)   | $E^2$  |
|----------------------------------------------|--------------------|-------|----------------------------------------------|--------------------|--------|
| <b>Phenyl Ring 1 (atoms 1-11)</b>            |                    |       | <b>Phenylacrylnitrile moiety</b>             |                    |        |
| BD(2)C 1 - C 3                               | BD*( 2)C 9 - C 11  | 20.58 | BD( 1)C 38 - C 40                            | BD*( 2)C 40 - C 41 | 753.42 |
| BD(2)C 5 - C 7                               | BD*( 2)C 9 - C 11  | 20.37 | BD( 1)C 38 - C 39                            | BD*( 1)C 40 - C 41 | 706.11 |
| BD(2)C 9 - C 11                              | BD*( 2)C 5 - C 7   | 20.31 | BD( 1)C 36 - C 38                            | BD*( 1)C 40 - C 41 | 437.57 |
| BD(2)C 1 - C 3                               | BD*( 2)C 5 - C 7   | 20.25 | BD( 2)C 39 - N 54                            | BD*( 3)C 39 - N 54 | 252.49 |
| BD(2)C 5 - C 7                               | BD*( 2)C 1 - C 3   | 19.80 | BD( 1)C 41 - C 43                            | BD*( 2)C 40 - C 41 | 119.45 |
| BD(2)C 9 - C 11                              | BD*( 2)C 1 - C 3   | 18.80 | BD( 2)C 40 - C 41                            | BD*( 2)C 43 - C 45 | 74.72  |
| <b>Phenyl Ring 2 (atoms 14-24)</b>           |                    |       | BD( 1)C 41 - H 42                            | BD*( 3)C 39 - N 54 | 59.00  |
| BD( 2)C 14 - C 23                            | BD*( 2)C 19 - C 21 | 20.92 | BD( 1)C 39 - N 54                            | BD*( 1)C 40 - C 41 | 49.06  |
| BD( 2)C 15 - C 17                            | BD*( 2)C 19 - C 21 | 20.64 | BD( 1)C 40 - C 49                            | BD*( 2)C 40 - C 41 | 45.89  |
| BD( 2)C 15 - C 17                            | BD*( 2)C 14 - C 23 | 20.06 | BD( 2)C 36 - C 38                            | BD*( 3)C 39 - N 54 | 35.96  |
| BD(2)C 14 - C 23                             | BD*( 2)C 15 - C 17 | 19.45 | BD( 2)C 47 - C 49                            | BD*( 2)C 43 - C 45 | 35.30  |
| BD( 2)C 19 - C 21                            | BD*( 2)C 14 - C 23 | 16.17 | BD( 2)C 36 - C 38                            | BD*( 2)C 43 - C 45 | 32.08  |
| BD( 2)C 19 - C 21                            | BD*( 2)C 15 - C 17 | 15.85 | BD( 1)C 40 - C 41                            | BD*( 3)C 39 - N 54 | 32.06  |
| <b>Phenyl Ring 3 (atoms 26-35)</b>           |                    |       | BD( 1)C 38 - C 39                            | BD*( 3)C 39 - N 54 | 28.95  |
| BD( 2)C 26 - C 34                            | BD*( 2)C 31 - C 32 | 23.10 | BD( 1)C 39 - N 54                            | BD*( 2)C 36 - C 38 | 18.98  |
| BD( 2)C 31 - C 32                            | BD*( 2)C 36 - C 38 | 22.28 | BD( 1)C 38 - C 39                            | BD*( 3)C 39 - N 54 | 16.82  |
| BD( 2)C 31 - C 32                            | BD*( 2)C 26 - C 34 | 20.74 | BD( 2)C 40 - C 41                            | BD*( 2)C 36 - C 38 | 15.31  |
| BD( 2)C 27 - C 29                            | BD*( 2)C 26 - C 34 | 19.80 |                                              |                    |        |
| BD( 2)C 26 - C 34                            | BD*( 2)C 25 - N 53 | 19.35 | <b>Lone pair electrons in nitrogen atoms</b> |                    |        |
| BD( 2)C 31 - C 32                            | BD*( 2)C 27 - C 29 | 19.79 | LP( 1)N 51                                   | BD*( 2)C 12 - C 13 | 32.07  |
| BD( 2)C 26 - C 34                            | BD*( 2)C 27 - C 29 | 18.77 | LP( 1)N 51                                   | D*( 2)C 25 - N 53  | 47.01  |
| BD( 2)C 27 - C 29                            | BD*( 2)C 31 - C 32 | 17.54 | LP( 1)N 53                                   | BD*( 1)C 25 - N 51 | 8.49   |
| <b>Imidazole ring (atoms 12,13,25,51-53)</b> |                    |       | LP( 1)N 53                                   | BD*( 1)C 12 - C 13 | 5.78   |
| BD( 2)C 25 - N 53                            | BD*( 2)C 12 - C 13 | 21.75 | LP( 1)N 54                                   | BD*( 2)C 36 - C 38 | 6.23   |
| BD( 1)C 12 - C 13                            | BD*( 2)C 25 - N 53 | 15.44 |                                              |                    |        |
| BD( 2)C 14 - C 23                            | BD*( 2)C 12 - C 13 | 12.33 |                                              |                    |        |
| BD( 1)C 12 - C 13                            | BD*( 2)C 14 - C 23 | 8.99  |                                              |                    |        |
| BD( 2)C 25 - N 53                            | BD*( 2)C 26 - C 34 | 8.74  |                                              |                    |        |
| BD( 1)C 12 - C 13                            | BD*( 2)C 9 - C 11  | 8.27  |                                              |                    |        |
| BD( 1)C 13 - N 53                            | BD*( 1)C 25 - C 26 | 6.12  |                                              |                    |        |
| BD( 1)C 12 - C 13                            | BD*( 1)C 11 - C 12 | 4.81  |                                              |                    |        |

**Table S11** The selected second order perturbation energy ( $E^2$  in kcal mol<sup>-1</sup>) for compound **2** at cation environment.

| Donor NBO (i)                      | Acceptor NBO (j)    | $E^2$  | Donor NBO (i)                                | Acceptor NBO (j)    | $E^2$  |
|------------------------------------|---------------------|--------|----------------------------------------------|---------------------|--------|
| <b>Phenyl Ring 1 (atoms 1-11)</b>  |                     |        | <b>Imidazole ring (atoms 12,13,25,51-53)</b> |                     |        |
| BD (2) C 5 - C 7                   | BD*( 2) C 9 - C 11  | 64.34  | BD ( 1) C 13 - N 53                          | BD*( 1) C 14 - C 15 | 56.72  |
| BD ( 1) C 5 - H 6                  | BD*( 2) C 5 - C 7   | 53.66  | BD ( 1) C 13 - N 53                          | BD*( 1) C 15 - H 16 | 23.53  |
| BD ( 1) C 7 - C 9                  | BD*( 2) C 5 - C 7   | 43.01  | BD ( 1) C 13 - C 14                          | BD*( 1) C 14 - C 15 | 21.98  |
| BD ( 1) C 5 - H 6                  | BD*( 1) C 7 - H 8   | 32.52  | BD ( 1) C 25 - C 26                          | BD*( 1) C 26 - C 27 | 11.00  |
| BD (2) C 9 - C 11                  | BD*( 2) C 5 - C 7   | 27.05  | BD ( 1) C 12 - N 51                          | BD*( 1) C 13 - C 14 | 4.07   |
| BD ( 2) C 5 - C 7                  | BD*( 2) C 9 - C 11  | 22.72  | BD ( 1) C 12 - N 51                          | BD*( 1) C 47 - H 48 | 4.05   |
| BD ( 2) C 1 - C 3                  | BD*( 2) C 9 - C 11  | 20.68  | <b>Phenylacrylnitrile moiety</b>             |                     |        |
| BD ( 1) C 5 - H 6                  | BD*( 1) C 3 - H 4   | 22.34  | BD ( 1) C 43 - C 45                          | BD*( 1) C 47 - H 48 | 188.44 |
| BD ( 2) C 1 - C 3                  | BD*( 2) C 5 - C 7   | 22.30  | BD ( 1) C 47 - C 49                          | BD*( 1) C 47 - H 48 | 141.89 |
| <b>Phenyl Ring 2 (atoms 14-21)</b> |                     |        | BD ( 2) C 36 - C 38                          | BD*( 2) C 31 - C 32 | 87.93  |
| BD ( 1) C 21 - H 22                | BD*( 1) C 14 - C 15 | 108.26 | BD ( 1) C 40 - C 49                          | BD*( 1) C 47 - H 48 | 35.39  |
| BD ( 1) C 21 - H 22                | BD*( 1) C 21 - C 23 | 95.71  | BD ( 1) C 39 - N 54                          | BD*( 1) C 45 - H 46 | 25.60  |
| BD ( 1) C 21 - H 22                | BD*( 2) C 21 - C 23 | 89.40  | BD ( 3) C 39 - N 54                          | BD*( 2) C 31 - C 32 | 25.58  |
| BD ( 1) C 21 - H 22                | BD*( 1) C 15 - H 16 | 56.20  | BD ( 1) C 39 - N 54                          | BD*( 3) C 39 - N 54 | 15.01  |
| BD ( 1) C 21 - H 22                | BD*( 1) C 17 - C 19 | 47.61  |                                              |                     |        |
| BD ( 1) C 14 - C 23                | BD*( 2) C 27 - C 29 | 30.98  | <b>Lone pair electrons in nitrogen atoms</b> |                     |        |
| BD ( 1) C 19 - C 21                | BD*( 1) C 21 - C 23 | 31.41  | LP ( 1) N 51                                 | LP*( 1) C 25        | 130.25 |
| BD ( 1) C 19 - C 21                | BD*( 2) C 21 - C 23 | 15.48  | LP ( 1) N 51                                 | LP*( 1) C 25        | 129.56 |
| BD ( 1) C 19 - C 21                | BD*( 1) C 26 - C 27 | 14.13  | LP ( 1) N 53                                 | D*( 2) C 31 - C 32  | 43.11  |
| <b>Phenyl Ring 3 (atoms 26-35)</b> |                     |        | LP ( 1) N 51                                 | BD*( 2) C 12 - C 13 | 28.32  |
| BD ( 2) C 27 - C 29                | BD*( 2) C 31 - C 32 | 173.41 | LP ( 1) N 53                                 | BD*( 2) C 12 - C 13 | 26.46  |
| BD ( 2) C 26 - C 34                | BD*( 2) C 31 - C 32 | 83.29  |                                              |                     |        |
| BD ( 2) C 31 - C 32                | BD*( 2) C 26 - C 34 | 41.35  |                                              |                     |        |
| BD ( 2) C 27 - C 29                | BD*( 2) C 26 - C 34 | 29.84  |                                              |                     |        |
| BD ( 1) C 25 - C 26                | BD*( 2) C 27 - C 29 | 23.24  |                                              |                     |        |
| BD ( 2) C 31 - C 32                | D*( 2) C 36 - C 38  | 15.26  |                                              |                     |        |
| BD ( 1) C 26 - C 34                | BD*( 1) C 26 - C 27 | 8.70   |                                              |                     |        |
|                                    |                     |        |                                              |                     |        |

**Table S12** The selected second order perturbation energy ( $E^2$  in kcal mol<sup>-1</sup>) for title compound at anion environment.

| Donor NBO (i)                                | Acceptor NBO (j)    | $E^2$ | Donor NBO (i)                                | Acceptor NBO (j)      | $E^2$  |
|----------------------------------------------|---------------------|-------|----------------------------------------------|-----------------------|--------|
| <b>Phenyl Ring 1 (atoms 1-11)</b>            |                     |       |                                              |                       |        |
| BD ( 2) C 7 - C 9                            | BD*( 2) C 1 - C 11  | 24.61 | Im and Ph ring 1-2                           | mring3:12,13,25,51-53 |        |
| BD ( 2) C 1 - C 11                           | BD*( 2) C 3 - C 5   | 23.39 | BD ( 2) C 39 - N 53                          | BD*( 3) C 39 - N53    | 522.44 |
| BD ( 2) C 3 - C 5                            | BD*( 2) C 7 - C 9   | 20.86 | BD ( 1) C 41 - H 42                          | BD*( 3) C 39 - N 53   | 322.59 |
| BD ( 2) C 3 - C 5                            | BD*( 2) C 1 - C 11  | 20.72 | BD ( 3) C 39 - N 53                          | BD*( 1) C 43 - C 45   | 173.45 |
| BD ( 2) C 14 - C 23                          | BD*( 2) C 19 - C 21 | 23.68 | BD ( 1) C 40 - C 41                          | BD*( 3) C 39 - N 53   | 168.06 |
| BD ( 2) C 15 - C 17                          | BD*( 2) C 19 - C 21 | 19.87 | BD ( 2) C 39 - N 53                          | BD*( 1) C 40 - C 41   | 145.19 |
| BD ( 2) C 19 - C 21                          | BD*( 2) C 15 - C 17 | 19.56 | BD ( 2) C 39 - N 53                          | BD*( 2) C 39 - N 53   | 134.48 |
| BD ( 2) C 7 - C 9                            | BD*( 2) C 3 - C 5   | 19.51 | BD ( 1) C 41 - H 42                          | BD*( 1) C 40 - C 41   | 113.22 |
| BD ( 2) C 1 - C 11                           | BD*( 2) C 7 - C 9   | 18.25 | BD ( 1) C 41 - H 42                          | BD*( 2) C 39 - N 53   | 81.53  |
| BD ( 2) C 19 - C 21                          | BD*( 2) C 14 - C 23 | 17.97 | BD ( 1) C 40 - C 41                          | BD*( 1) C 40 - C 41   | 47.62  |
|                                              |                     |       | BD ( 1) C 41 - C 43                          | BD*( 3) C 39 - N 53   | 43.59  |
| <b>Phenyl Ring 3 (atoms 26-35)</b>           |                     |       | BD ( 1) C 39 - N 53                          | BD*( 2) C 47 - C 49   | 37.17  |
| BD ( 2) C 26 - C 34                          | BD*( 2) C 31 - C 32 | 28.82 | BD ( 1) C 38 - C 40                          | BD*( 2) C 39 - N 53   | 35.77  |
| BD ( 2) C 26 - C 34                          | BD*( 2) C 25 - N 51 | 19.06 | BD ( 1) C 31 - C 36                          | BD*( 3) C 39 - N 53   | 33.58  |
| BD ( 2) C 27 - C 29                          | BD*( 2) C 26 - C 34 | 18.53 | BD ( 1) C 40 - C 41                          | BD*( 2) C 39 - N 53   | 33.42  |
| BD ( 2) C 27 - C 29                          | BD*( 2) C 31 - C 32 | 16.29 | BD ( 1) C 38 - C 39                          | BD*( 3) C 39 - N 53   | 30.16  |
| BD ( 1) C 27 - C 29                          | BD*( 1) C 40 - C 41 | 15.63 | BD ( 1) C 41 - C 43                          | BD*( 1) C 40 - C 41   | 28.41  |
| BD ( 2) C 26 - C 34                          | BD*( 2) C 27 - C 29 | 15.55 | BD ( 3) C 39 - N 53                          | BD*( 1) C 45 - H 46   | 26.41  |
| <b>Imidazole ring (atoms 12,13,25,51-53)</b> |                     |       | BD ( 2) C 43 - C 45                          | BD*( 2) C 40 - C 41   | 18.92  |
| BD ( 2) C 25 - N 51                          | LP ( 2) N 52        | 34.86 | BD ( 2) C 47 - C 49                          | BD*( 2) C 40 - C 41   | 18.98  |
| BD ( 2) C 25 - N 51                          | BD*( 2) C 12 - C 13 | 24.07 |                                              |                       |        |
| BD ( 2) C 14 - C 23                          | BD*( 2) C 15 - C 17 | 19.32 | <b>Lone pair electrons in nitrogen atoms</b> |                       |        |
| BD ( 2) C 12 - C 13                          | BD*( 2) C 25 - N 51 | 15.56 | LP ( 2) N 52                                 | BD*( 2) C 12 - C 13   | 63.88  |
| BD ( 2) C 25 - N 51                          | BD*( 2) C 26 - C 34 | 14.50 | LP ( 2) N 52                                 | BD*( 2) C 25 - N 51   | 83.33  |
| BD ( 2) C 12 - C 13                          | BD*( 2) C 1 - C 11  | 14.17 |                                              |                       |        |
| BD ( 2) C 12 - C 13                          | BD*( 2) C 14 - C 23 | 12.74 |                                              |                       |        |
| BD ( 2) C 14 - C 23                          | BD*( 2) C 12 - C 13 | 10.53 |                                              |                       |        |

## SCXRD

Crystallographic data (excluding structure factors) reported in this paper have been deposited with the Cambridge Crystallographic Data Centre as supplementary publication no. CCDC 1888014. Copies of available material can be obtained, free of charge, on application to the CCDC, 12 Union Road, Cambridge CB2 1EZ, UK, (fax: +44-(0)1223-336033 or e-mail: deposit@ccdc.cam.ac.uk).

## Reference

- 1 S. Dhimi, A. J. De Mello, G. Rumbles, S. M. Bishop, D. Phillips and A. Beeby, *Photochem. Photobiol.*, 2018, **61**, 341–346.
- 2 J. L. Bredas, R. Silbey, D. S. Boudreaux and R. R. Chance, *J. Am. Chem. Soc.*, 1983, **105**, 6555–6559.
- 3 M. M. Duvenhage, M. Ntwaeaborwa, H. G. Visser, P. J. Swarts, J. C. Swarts and H. C. Swart, *Opt. Mater. (Amst)*., 2015, **42**, 193–198.
- 4 R. C. Clark and J. S. Reid, *Acta Crystallogr. Sect. A*, 1995, **51**, 887–897.
